# Supplementary material
Source: MDPI journal article supplement (https://www.mdpi.com/2077-1312/6/1/14)
Supplement: s1 [file s1]

## Sheet: Data
Highest significant wave height measured during the storm period (shaded values exceeded the storm alert threshold [0.25 year Return period])
Storm season	Site No.	1	2	3	4	5	6	7	8	9	10	11	12	13	14	15	16	17	18	19	20	21	22	23	24	25	26	27	28	29	30	31	32	33	34	35	36	37	38	39	40
	Date	Nbg	Wtb	Sca	Hrn	ChP	NWl	BkO	Hpg	Fxs	GdS	Flk	Rye	PBy	Sfd	Rst	BkB	HgI	SBy	Mlf	Bos	Wey	Csl	WBy	Dwl	Tor	StB	LoB	Plv	Pnz	SMS	Hub	Prp	Bdf	Mhd	Wst	RhF	GyM	NBr	Clv	McB
2003/2004	2004-01-08											3.25				4.17		3.64	3.17		3.62
	2004-06-23											3.18		3.76		3.9		2.99	1.77		2.02
2005/2006	01-02/12/2005											2.9		3.55		3.84		3.53	3.79	3.53
2006/2007	2006-12-03						2.15	1.98				3.13		4.1		4.81		3.42	2.73	3.51	3.09			5.24
	2007-01-18						3.03	3.54				2.59		4.23		4.32		3.58	2.16	3.64	2.53	2.1		4.63									5.51		2.24
	05-06/03/2007						1.81	1.47				2.51		3.32		3.58		3.34	2.74	2.94	2.87	2.2		5.61									4.4
2007/2008	08-09/11/2007						1.86	4.69				0.96		1.43		1.47		0.99	0.62	1.22	0.75	0.58	1.77	1.38			0.43			0.45			3.28		1.93		3.66
	09-10/12/2007						1.91	3.31				2.08		2.89		3.51		2.86	1.63	3.02	1.89	1.72	4.51	3.69			2.65			2			6.9		2.34		3.31
	2008-01-13							1.3				2.18		2.42		2.8		2.65	2.51	2.15	3.18	2.58	4.02				3.49			4.54					0.95		0.74
	2008-03-01						2.12	3.38						2.95	3.62	2.85		2.06	1.1	2.07	1.18	1.07	2.96	2.42			1.14			0.91			4.13		2.47		3.97
	10-11/03/2008						1.94	2.26				3.58		3.89	4.48			3.79	3.63	3.42	3.84	2.41	5.37	5.05			3.17			2.94			6.37		2.77		2.51
	2008-03-12						2.22	2.74				1.39		2.69	3.41			2.06	1.15	2.31	1.36	1.11	3.32	2.6			1.67			1.4			6.53		2.73		3.7
	21-22/03/2008						2.94					1.04		2.37	2.37	2.07		1.36	0.88	1.42	0.82	0.76	2.1	1.59			1.06			0.76			4.56		2.35		3.8
2008/2009	2008-12-13				2.89		1.69	1.93			2.18	2.97	3.5	3.97	4.3	4.01	2.61	3.64	3.36	2.28	3.55	2.57	3.89	3.87		1.29	2.54			2.4			3.53		0.84		0.86
2009/2010	13-14/11/2009				1.78		1.75	1.74			2.52	2.65	4.37	3.61	4.53	3.91	3.7	3.36	0.69	4.08	3.1	2.62	6.5	6		1.34	3.26	5.25		5.01			5.18	4.36	2.53	2.42	1.89	2.35
	22-23/11/2009				1.24		2	1.68			2.47	2.39	4.26	3.49	3.55	3.72	3.83	2.84	1.39	3.08	1.95	1.64	4.57	4.05		0.77	2.66	3.67		2.62			5.69	5.16	2.4	2.4	2.42	3.16
	17-18/12/2009				4.87		3.19	5.44			2.07	1.51	1.69	1.86	0.78	1.37	0.87	1.05	1.27	0.45	0.61	0.87	0.89	0.62		1.85	1.95	0.89		0.59			2.26	1.47	1.24	1.6	2.07	2.05
	10/01/2010				4.08		2.45	3.89			1.91	1.15	1.12	1.1	0.45	0.85	0.46	0.65	0.89	0.24	0.41	0.7	0.57	0.47		1.63	2.01	0.55		0.43			1.11	0.64	1.29	0.93	1.31	1.27
	2010-01-16				2.41		1.14	1.6			1.77	2.41	2.84	2.99	2.93	3.1	2.46	2.56	0.6	2.26	2.6	2.54	4.03	4.06		1.96	3.73	4.82		4.7			3.04	2.6	1.06	0.61	1.07	1.53
	2010-03-31				1.71		1.13	1.96			2.35	2.21	4.31	3.33	4.03	3.03	3.46	2.2	1.44	2.96	1.82	1.24	3.51	2.97		0.67	1.28	2.01		0.96			6.25	5.18	2.68	1.73	4.22	4.3
2010/2011	2010-08-29	2.51	4.39		2.89		2.21	3.82			1.28	0.81	1.6		1.67	1.55	1.26		1.44	0.88	0.5	0.44	1.18	0.81		0.43	0.35	0.55		0.35			1.8	1.74	1.57	1.08	2.66	2.9
	08-09/11/2010	5.25	4.72		4.04		2.24	3.62			2.1	2.92	3.58	4.13	4.21	3.86	2.73	3.25	2.93	2.69	3.21	2.16	3.98	4.2		1.97	2.93	3.44		2.22			4.5	4.02	1.85	1.53	2	1.87
	11-12/11/2010	2.41	1.33		2.17		1.81	2.23			2.81	2.75	4.35	4.02	4.82	3.76	3.37	3.25	1.42	2.93	2.65	1.76	4.4	4.29		0.93	2.35	3.31		1.98			6.3	5.52	2.49	2.77	4.17	4.87
	2010-12-01	4.39	4.72		3.87		2.48	4.63			1.8	1.14	1.37	1.38	0.57	1.07	0.67	0.74	1.04	0.29	0.62	0.92	0.73	0.6		2.05	2.4	0.88		0.55			1.56	0.78	1.43	1.13	1.55	1.54
2011/2012	12-14/12/2011				1.68		2.27	1.84			3.16	3.11		4.42	5.21	4.55	3.64	3.77	2.87	3.24	2.86	2.26	5.53	4.84	2.29	1.11	2.96	3.98	5.03	2.45			5.32	5.09	1.8	2.02	2.39	3.55		4.25	3.65
	2011-12-15				0.69		0.83	1.37			1.67	1.67		2.75	3.37	2.79	2.86	2.22	1.2	2.4	1.85	1.26	3.79	3.28	1.26	0.82	1.88	2.63	4.38	1.51			6.75	5.14	2.51	1.87	1.46	1.82		1.62	1.54
	2012-01-03				1.63		2.01	2.31			3	2.77	4.68	3.51	4.33	3.86	3.67	3.32	1.88	3.93	2.78	1.63	5.87	5.55	2.05	1.17	2.73	4.44	5.53	2.26			5.4	4.96	2.58	2.09	3.43			4.28	3.17
	04-05/01/2012				2.55		2.39	2.54			1.97	1.69	4.06	3.22	3.74	3.09	3.47	2.31	1.23	2.55	1.31	1.23	3.46	2.74	0.87	0.75	1.7	2.05	3.56	1.22			5.62	5.82	2.67	2.33	3.47			5.03	3.22
	03-04/04/2012				4.99		2.36	3.55			0.93	0.56	1.19	0.73	0.62	0.77	0.66	0.51	0.42	0.58	0.41	0.29	1	0.64	0.63	0.55	0.67	0.46	0.73	0.39			3.6	2.24	1.49	1.21	3.31	3.25		1.91	1.4
	29-30/04/2012				3.37			4.05			2.09	1.09	1.65	1.61	1.8	2.31	1.76	2.45	2.59	1.68	3.22	3.34	3.97		4.63	3.06	4.36	3.06	1.46	2.19			3.48	1.34	2.54	1.66	2.27	2.56		1.85	1.32
2012/2013	2013-03-12		4.33	3.89	3.12	2.79	1.49	3.24	2.99	2.67	2.51	1.92	2.21	2.2	0.97	1.9	1.18	1.21	1.82	0.54	1.15	1.78	1.36	1.02	2.34	3.73	3.78	1.76	1.44	1.57			1.91	1.1	2.16	1.49	1.76	1.52		0.98	0.89
	23-24/03/2013		5.23	5.41	4.52	2.97	1.37	3.96	2.98	2.53	1.85	1.29	1.57	1.54	0.79	1.67	1.15	1.34	1.79	1.16	1.13	1.47	2.02	2.22	2.05	2.32	2.17	2.16	3.29	1.82			1.99	1.77	1.36	0.84	1.42	1.69		1.23	1.24
	23-24/05/2013		5.83	5.71	3.58	2.91	1.52	3.09	2.24	1.33	1.06	0.65		0.84	1.03	1.08	1.03	0.91	0.63	0.76	0.38	0.43	1.17	0.8		0.6	0.58	0.56	0.71	0.51			3.13	2.1	1.66	1.28		2.96			1.42
2013/2014	10-11/09/2013	3	4.57	4.96	3.28	3.3	2.22	3.74	3.53	1.06	1.63	0.58		0.68	0.67	0.75	0.73	0.59	0.36	0.59	0.37	0.37	1.02	0.6	0.36	0.32	0.42	0.47	0.71	0.29			1.8	1.49	1.15	0.88	1.97	2.28		1.61	1.02
	09-12/10/2013	4.15	6.26	6.03	4.16	3.63	3.01	4.45	4.06	2.77	2.06	1.02		1.16	0.9	1.08	0.91	0.85	0.96	0.63	0.76	0.74	0.91	0.51	1	1.32	1.39	0.68	0.85	0.46			2.42	1.74	1.31	1.24	2.64	3.31		2.77	2
	2013-10-28	0.63	0.6	0.69	0.9	1.31	1.44	2.37	1.18	2.22	3.38	3.25		4.44	5.11	4.82	4.03	3.73	2.71	3.93	3.01	2.28	5.52	5.17	2.21	1.07	2.95	4.11	5.1	2.86			4.41	3.45	1.85	1.65	1.74	2.47		2.38	2.02
	02-03/11/2013	2.03	1.85	1.7	1.31	1.74	1.94	2.06	1.04	1.45	2.11	1.87		2.9	3.41	3.31	2.79	2.34	2.05	2.49	1.82	1.51	3.95	3.19	1.44	0.78	2.02	2.72	4.57	1.84			6.5	6.07	2.31	2.16	3.36	4.52		4.13	3.38
	20-21/11/2013	2.76	2.33	2.73	2.26	2.4	2.08	2.73	2.43	2.12	1.47	0.81		1.44	2.13	1.95	1.6	1.18	0.87	1.36	0.72	0.64	1.97	1.54	0.79	1.1	1.39	1.19	1.93	0.58			4.73	3.57	2.78	1.47	4.02	4.14		3.33	2.36
	05-06/12/2013	3.5	5.29		3.79	3.03	2.1	3.75	3.23	1.47	1.71	1.49		2.17	2.91	2.47	2.2	1.53	0.88	1.64	1	0.71	2.09	1.61	0.57	0.6	0.73	1.2	1.72	0.51			3.96	3.85	2.16	1.57	3.96	4.61		4.71	4.33
	23-24/12/2013	2.38	1.68	2.14	2.11	2.11	1.96	2.18	1.29	2.29	3.69	3.41		4.79	5.18	5.46	4.13		3.51	3.74	3.25	2.68	7.23	6.42	3.15	1.42	3.65	5.53	6.43	4.24			5.28	3.72	1.3	1.43	1.97	2.7		3.67	3.29
	2013-12-27	2.78	1.65	2.2	2.37	2.34	2.28	1.87	1	2.01	3.18	3.1		3.62	4.42	4.26	3.26		2.64	2.82	2.59	1.97	4.33	4.01	2.56	1.06	2.64	3.64	5.27	2.47			6.81	6.93	1.91	1.84	2.6	3.8		4.37	4.38
	2014-01-01	3.09	2.2	2.95	1.41	2.21	1.74	1.75	1.23	1.67	2.79	2.76		3.52	4.29	4.01	2.88		3.26		3.81	3.3	4	4.9	3.11	1.66	2.97	3.89	4.8	3.32			3.85	4.84	0.92	1	1.33	1.77		1.81	1.9
	03-04/01/2014	2.2	1.61	1.69	1.51	1.53	1.71	1.59	0.98	1.62	2.33	2.38		2.98	3.53	3.56	3.89		2.15	3.71	2.75	1.87	5.35	4.35	1.91	0.91	3.02	4.22	6.99	2.25			5.87	6.27	1.68	1.55	1.87	2.44		3.18	3.32
	06-07/01/2014	2.14	1.33	1.48	1.52	1.41	1.47	1.46	0.91	1.46	3.01	2.63		2.76	3.11	3.01	3.43		2.06	3.18	2.4	1.74	5.02	4.5	2	1	2.79	4.71	6.79	2.31			5.8	6.18	1.24	1.17	1.73	2.21		3.02	2.68
	31-01/02/2014	3.14	1.74	2.85	2.27	2	1.96	1.69	1.08	1.75	2.5	2.9		3.61	4.34	3.93	3.27	2.86	2.68	2.78	2.89	2.01	4.05	3.31	2.35	0.95	2.27	3.47	5	2.86			7.28	5.89	1.75	1.38	1.65	2.81		3.8	2.86
	04-05/02/2014	3.93	3.08	3.11	2.49	1.76	1.78	1.82	1.35	2.18	2.73	3.64		4	4.8	4.72	4.07	4.13	3.4	4.03	3.95	4.02	6.99	7.08	5.62	2.56	4.69	7.09	6.46	6.06			6.47	6.16	2.02	2.08	1.54	2.24		1.89	1.35
	08-09/02/2014	2.52	1.32	1.9	1.76	1.77	2.12	1.83	0.96	1.7	3	2.71		3.53	3.96	3.9	3.92	3.49	2.58	3.77	2.62	1.96	5.68	5.36	2.5	1.04	2.93	4.74		3.25			7.21	7.36	2.36	2.41	1.9	2.88		2.84	2.21
	12-13/02/2014	3.37	1.72	2.55	2.52	2.59	2.22	2.18	1.18	1.76	2.65	2.93		3.74	4.19	4.18	3.24	3.5	3.35	3.15	3.47	2.54	4.9	4.93	3.03	1.4	3.19	4.77		3.44				6.84	2.25	2.55	3.83	4.72		4.87	4.46
	14-15/02/2014	3.06	2.08	3.29	2.87	2.09	2.79	2.46	1.56	2.13	2.92	2.64		4.26	5.34	4.97	4.47	4.07	2.87	4.5	3.48	2.85	7.7	6.22	4.14	2.48	5.25	7.32		5.98				5.91	2.03	2.33	2.52	3.07		2.83	2.62
2014/2015	2014-10-06	2.95	1.89	2.19	1.89	1.56	1.06	1.17	0.91	1.37	1.66	1.91		2.37	2.59	2.86	2.28	2.99	2.87	1.99	3.29	2.57	3.92	4.21	3.46	1.63	3.01	3.66	4.77	3.88	5.3		2.52	2.2	0.9	0.93	1.42	1.98	0.52	2.06	2.05
	21-22/10/2014	2.18	3.71	3.92	2.18	2.4	1.9	3.36	2.7	1.26	2.06	1.61		2.44	3.28	2.73	2.77	1.93	1.17	2.22	1.32	1.18	3.22	2.67	1.13	0.65	1.45	2.06	2.87	1.06	2.58		4.84	5	2.55	1.85	3.83	4.47		3.85	3.32
	2014-11-13	3.08	1.98	2.47	2.02	1.42	0.99	1.27	0.94	1.62	1.48	1.91		2.36	2.58	2.62	1.92	2.43	2.18	1.65	2.61	2.58	3.45	3.71	4.16	2.13	3.62	3.59	3.07	2.75	3.48		2.42	2.01	1.01	0.81	1.29	1.77		1.83	1.55
	10-11/12/2014	1.05	1.53	1.23	1.26	1.23	1.61	2.28	0.92	1.36	2.57	2.08		3.09	3.63	2.95	2.65	1.91	1.39	2.23	1.36	1.15	3.28	2.74	1.01	0.65	1.75	2.19	3.35	1.45	3.08		6.12	5.64	2.13	1.9	2.89	3.96	1.69	4.76	3.82
	14-15/01/2015	2.83	1.44	2.51	2.15	2.08	2.04	1.82	1.11	1.65	2.98	2.71		3.95	4.61	3.98	3.66	3.37	2.52	3.13	2.72	2.09	6.15	6.24	2.72	1.19	3.22	5.05	6.08	3.65	5		5.34	5.31	1.7	1.68		3.17	1.2	3.99	3.6
	2015-02-24	0.81	1.45	1.31	1.12	1.05	1.29	1.93	1.23	1.18	1.84	1.3		2.35	2.66	2.5	2.62	2.05	1.11	2.11	1.38	1.16	3.14	2.25	0.76	0.58	1.4	1.87	3.65	1.16	2.41		6.75	5.18	2.14	1.56	2.3	3.51	1.47	2.93	2.74
2015/2016	2015-11-17	0.98	1.11	0.93	1.01	1.55	2.1	2.41	0.98	1.45	2.31	1.79		2.77	3.65	2.95	3.06	2.38	1.6	2.67	1.8	1.29	3.92	3.21	1.33	0.81	1.79	2.49	3.79	1.72	3.19	5.65	4.39	5.09	2.41	2.61	2.68	3.94	0.76	2.93	2.01
	2015-11-21	4.74	6.68	6.7	3.76	3.54	3.21	4.13	3.84	1.61	1.85	0.81		1.28	1.59	1.48	1.54	1.22	0.56	1.09	0.48	0.5	1.82	1.15	0.67	0.57	0.89	1.14	1.9	0.7	1.77	5.96	5.37	3.37	2.07	1.69	3.77	3.05	0.85	2.19	1.55
	2015-11-29	1.19	1.82	1.42	1.25	1.4	1.52	2.39	1.28	1.45	2.15	1.79		3.31	3.8	3.68	3.54	2.73	1.66	2.81	1.73	1.25	3.55	2.85	1.74	0.56	1.99	2.39	3.8	1.44	3.57	6.58	5.36	5.33	2.22	2.08	3.34	4.49	1.97	4.52	3.94
	30-31/12/2015	3.07	1.84	2.78	2.26	1.89	1.58	1.68	1.07	1.61	2.2	2.23		3.07	3.42	3.79	3.33	3.14	2.76	3.43	3.13	2.72	4.86	5.13	3.22	1.84	3.63	4.73	7.13	4.6	5.87	6.24	4.3	4.93	1.69	1.63	1.73		0.6	3.15	2.49
	01-02/01/2016	4.13	3.51	3.65	2.8	1.98		2.19		1.86	2.09	2.29		2.92	3.56	3.32	2.93	3.06	2.92	2.83	2.91	2.84	5.25	4.98	3.99	2.94	3.89	4.01	5.61	4.04	2.62	5.91	4.93	3.5	1.4	1.59	1.21		0.55	1.76	1.66
	03-04/01/2016	5.46	4.68	4.98	2.93	1.87		2.16		1.81	2.17	2.68		3.32	3.54	3.45	2.75	2.85	3.3	2.18	3.01	2.19	3.12	3.08	2.52	1.2	2.17	2.79	4.71	2.24		6.88	5.28	4.58	1.22	1.51	0.73		0.28	0.89	0.77
	01-02/02/2016	1.22	1.73	1.71	1.33	1.34		2.01		1.06	1.59	1.42		2.45	2.84	2.51	2.69	2.01	1.31	2.13	1.35	0.95	2.7	2.2	0.79	0.55	1.43	1.83	2.88	1.24		5.85	4.79	4.08	1.83	1.74	2.28		1.05	4.6	3.05
	07-08/02/2016	1.83	1.28	1.64	1.51	1.66		1.88		1.91	2.92	2.71		3.68	4.47	4.06	4.02	3.43	2.32	3.48	2.41	1.77	5.16	4.16	1.68	0.97	2.71	3.31	6.14	2.4		10.12	6.75	6.6	2.5	2.32	2.25		1.56	3.8	3.62
	02-03/03/2016	1.76	1.61	1.51	1.18	1.31		1.58		0.84	1.88	1.41		2.36	3.16	2.5	2.66	1.82	1.23	2.11	1.32	0.84	2.81	2.17	0.89	0.68	1.01	1.75	3.29	0.87	1.97	7.01	6.69	5.97	2.69	2.19	3.42	4.01	1.05	3.28	2.45
	27-28/03/2016	1.99	1.98	2.44	2.07	2.13		2.64		2.08	2.8	3.65		4.55	5.11	4.91	3.99	4.4	4.22	3.46	4.53	3.77	5.19	5.54	3.26	1.8	3.18	3.73	4.74	2.94	4.02	5.26	4.29	4.07	1.46	1.79	1.56	1.77	0.98	2.22	2.46
	2016-04-10	1.18	1.11	1.24	1.38	1.26		1.53		1.51	0.87	0.81		1.25	1.18	1.8	1.38	1.67	1.77	1	1.67	1.83	1.72	2.14	2.68	3.63	3.4	3.26	3.16	3.42	5.13	3.42	2.6	2.25			0.99	1.1	0.28	0.65	0.61
2016/2017	05-06/10/2016	2.22	2.23	2.19	2.02	1.93		2.42			1.59	1.23		1.74	1.03	2.03	1.35	1.43	2.16	0.75	1.63	2	1.49	1.29	2.36	3.45	3.44	1.63	1.22	1.24	2.4	2.17	1.26	0.92	1.35	0.58	1.2	1.47		1.09	0.88
	2016-10-23	2.69	2.56	2.54	2.2	1.51		1.59			1.02	0.86		1.32	0.65	1.4	1.07	1	1.76	0.5	1.12	1.63	1.24	1.01	2.16	3.07	3.32	1.63	0.91	1.41	4.01	2.09	1.09	0.61	1.42	0.61	1.04	1.05		0.69	0.51
	05-07/11/2016	4.38	5.05	4.62	4.08	3.21		4.4			2.09	0.73		0.96	0.83	0.95	0.55	0.67	0.35	0.36	0.24	0.28	0.56	0.4	0.42	0.67	0.83	0.35	0.58	0.38	1.05	3.25	2.71	1.59	1.15	0.86	2.8	2.88		1.81	0.97
	2016-11-20	1.34	2.01	2.5	1.97	1.53		1.62			3.13	3.92		4.76	4.87	4.65	3.18	3.73	3.99	2.33	4.18	3.87	3.94	4.64	4.05	2.34	3.47	2.65	3.76	2.36	3.42	3.06	2.13	1.79	2.03	1.47	0.99	1.06		0.74	0.48
	21-22/11/2016	5.27	5.09	4.24	3.08	2.02		1.89			2.48	2.68		3.94	5.1	4.35	3.57	3.5	2.79	2.55	2.58	1.76	2.24	2.17	2	1.77	1.98	1.61	1.5	0.98	2.31	5.55	4.44	1.91	2.04	1.09	3.06	2.96		2.11	1.47
	2017-01-13	4.45	7.26	6.76	4.37	3.59		4.28			1.61	0.87		1.6	1.78	2.09	1.83	1.46	0.79	1.31	0.66	0.59	1.69	1.09	0.57	0.52	0.69	0.83	2.17	0.62	2.02	5.51	4.76	3.98	2.24	1.07	3.84	4.55		3.4	2.29
	02-03/02/2017	2.52	1.67	2.25	1.77	1.27		1.07			1.18	1.72		2.47	2.46	2.9	3.09	2.91	2.38	3.41	2.61	2.4	6.41	5.31	3.39	2.1	3.33	5.85	8.51	4.83	6.72	7.16	4.68	4.61	1.49	1.52	1.51	1.87			1.95
	2017-02-13	3.35	3.13	3.28	2.68	2.41		2.51			1.64	1.07		1.77	1.19	2	1.21	1.38	2.08	0.65	1.37	1.87	1.64	1.45	2.57	3.41	3.38	1.86	1.08	1.54	3.98	2.29	0.7	0.61	1.6	0.93	1.25	1.3		1.17	0.96
	2017-02-23	3.2	4.37	4.48	2.69	2.49		3.54			2.45	2.11		2.9	3.31	2.98	2.92	2.2	1.52	2.31	1.58	1.15	3.17	2.74	1.1	0.79	1.44	1.98	2.82	1.07	2.56	5.94	5.11	5.61	2.46	2.07	4.65	6.37		4.36	3.14
Return Period Hs (m)	0.25 year	3.63	4.26	4.24	3.29	2.76	2.39	3.2	2.9	2.2	2.69	2.67	3.62	3.44	4.06	3.6	3.43	2.99	2.66	3.04	2.82	2.34	4.83	4.31	3.17	2.37	3.37	4.25	5.17	3.26	4.59	6.72	5.45	5.13	2.41	2.13	3.14	3.89	1.83	3.91	3.39
	1 year	4.327	5.451	5.474	4.094	3.255	2.778	3.809	3.567	2.633	3.03	3.172	4.243	4.06	4.718	4.308	3.96	3.543	3.248	3.61	3.405	3.022	5.718	5.441	3.905	3.004	3.946	5.029	6.248	4.352	5.245	7.445	6.346	6.061	2.779	2.473	3.767	4.506	2.013	4.567	3.934
	2 years	4.592	5.956	6.069	4.465	3.47	2.959	4.066	3.873	2.841	3.175	3.397	4.517	4.34	4.999	4.645	4.192	3.793	3.521	3.869	3.668	3.373	6.069	5.989	4.206	3.303	4.175	5.338	6.739	4.914	5.501	7.716	6.735	6.48	2.938	2.625	4.043	4.746	2.089	4.86	4.176
	5 years	4.894	6.573	6.843	4.939	3.734	3.192	4.379	4.263	3.113	3.352	3.681	4.858	4.689	5.342	5.081	4.477	4.106	3.87	4.193	3.997	3.85	6.48	6.706	4.564	3.69	4.444	5.698	7.36	5.677	5.801	8.025	7.214	7.003	3.133	2.814	4.387	5.024	2.179	5.226	4.48
	10 years	5.097	7.01	7.422	5.287	3.92	3.362	4.6	4.549	3.317	3.476	3.886	5.103	4.94	5.584	5.404	4.679	4.334	4.126	4.428	4.235	4.22	6.76	7.244	4.811	3.977	4.628	5.943	7.813	6.268	6.004	8.23	7.555	7.38	3.271	2.95	4.632	5.212	2.241	5.49	4.699
	20 years	5.283	7.426	7.995	5.628	4.098	3.529	4.81	4.828	3.52	3.594	4.085	5.338	5.183	5.814	5.721	4.873	4.554	4.377	4.655	4.465	4.596	7.02	7.778	5.043	4.261	4.798	6.17	8.254	6.869	6.191	8.416	7.881	7.744	3.402	3.08	4.869	5.384	2.3	5.745	4.911
	50 years	5.508	7.95	8.747	6.069	4.322	3.746	5.075	5.188	3.785	3.741	4.34	5.637	5.493	6.101	6.135	5.116	4.836	4.7	4.946	4.758	5.102	7.337	8.48	5.33	4.632	5.005	6.446	8.82	7.677	6.419	8.639	8.293	8.209	3.568	3.246	5.168	5.594	2.372	6.071	5.181
